# Supplementary material for: Distributions of p-values smaller than .05 in psychology: what is going on?
Source: PubMed Central journal article supplement (PMC4830257; doi:10.7717/peerj.1935), 2016-04-11
Supplement: peerj-04-1935-s001.pdf [file peerj-04-1935-s001.pdf]

# Supplemental file to Hartgerink, van Aert, Nuijten, Wicherts, and van Assen

March 22, 2016

## Modeling $p$ -value distributions

For both measures from the previous section the expected  $p$ -value distribution needs to be derived and compared to the observed  $p$ -value distribution. The observed  $p$ -value distribution of the psychology data is based on all exactly reported statistics with test statistics  $t$ ,  $r$ , and  $F(1, df_2)$ , because these readily provide the same effect measure. We used the Fisher transformed correlation,  $\rho_F$ , as effect size measure. The distribution of the Fisher transformed correlation is approximated well by the normal distribution, with Fisher transformation

$$\rho_F = \frac{1}{2} \ln\left(\frac{1+r}{1-r}\right) \quad (1)$$

and standard error  $\frac{1}{\sqrt{N-3}}$  or  $\frac{1}{\sqrt{df_2-1}}$ .  $F(1, df_2)$  and  $t$  values can be transformed to correlations using

$$r = \frac{\frac{F \times df_1}{df_2}}{\frac{F \times df_1}{df_2} + 1} \quad (2)$$

where  $F = t^2$ .

The expected  $p$ -value distribution was estimated under the assumption that the true effect size, Fisher transformed correlation  $\rho_F$ , is normally distributed with mean effect  $\delta_{\rho_F}$  and standard deviation  $\tau_{\rho_F}$ . The two parameters were estimated by minimizing the  $\chi^2$ -statistic

$$\chi_{j-1}^2 = \sum_{j=1}^J \frac{(rf_j^o - rf_j^e)^2}{rf_j^e} \quad (3)$$

with  $rf^o$  and  $rf^e$  being the relative frequency of observed and expected  $p$ -values in interval  $j$ , respectively. Minimization was done with the `optim()` function in R, where  $\hat{\tau}$  was truncated to be positive. Interval  $j$  is defined as  $(I_{j-1}, I_j) = ((j-1)x, jx)$ , with width  $x = .00025$  whenever only the significant  $p$ -values lower than .00125 were modeled (resulting in 5 intervals); .00125 when modeling all significant  $p$ -values (i.e.,  $p \leq .05$ , 40 intervals); .025 when modeling all  $p$ -values (also 40 intervals). The relative frequencies are conditional probabilities. For instance,  $rf_2^o$  is the proportion of observed  $p$ -values in interval  $(I_1 = .00025, I_2 = .0005)$  whenever  $p$ -values lower than .00125 are examined. Expected relative

frequency  $rf_j^e$  is computed as

$$rf_j^e = \frac{\sum_{k=1}^K P(I_{j-1} \leq p_k \leq I_j | N_k; \hat{\rho}_F; \hat{\tau}_{\rho_F})}{\sum_{k=1}^K P(p_k \leq I_j | N_k; \hat{\rho}_F; \hat{\tau}_{\rho_F})} \quad (4)$$

with the summation over all  $K$  significant test statistics.  $P$  corresponds to the probability that a  $p$ -value of study  $k$  (i.e.,  $p_k$ ) is in a certain interval, which depends on the study sample size  $N_k$  and the two estimated parameters of the effect size distribution (i.e.,  $\hat{\rho}_F, \hat{\tau}_{\rho_F}$ ).
